# Supplementary material for: Safety and Osteointegration of Titanium Screws Coated with a Fibroblast Growth Factor-2–Calcium Phosphate Composite Layer in Non-Human Primates: A Pilot Study
Source: MDPI journal article supplement (doi:10.3390/jfb14050261), 2023-05-08
Supplement: s1 [file s1]

Article

# Supplementary Materials: Safety and Osteointegration of Titanium Screws Coated with a Fibroblast Growth Factor-2–Calcium Phosphate Composite Layer in Non-Human Primates: A Pilot Study

Yukei Matsumoto <sup>1</sup>, Hirotaka Mutsuzaki <sup>2,3,\*</sup>, Yuki Hara <sup>1</sup>, Katsuya Nagashima <sup>1</sup>, Eriko Okano <sup>1</sup>, Yohei Yanagisawa <sup>1</sup>, Hiroshi Noguchi <sup>1</sup>, Tadashi Sankai <sup>4</sup> and Masashi Yamazaki <sup>1</sup>

The Bone apposition rate Weibull plot for control (Figure 6) could be regressed by a bent line with slopes ( $m$ ) of  $m > 1$  and  $m < 1$  as shown in Figure S1, which is indicative of the mixed or multi-modal Weibull distribution. Thus, the bent line is indicative of involvement of different mechanisms of causing impaired bone apposition in between the lower  $\sigma$  ( $\ln\sigma < -2.34$ ) and the higher  $\sigma$  ( $\ln\sigma > -2.34$ ) regions.

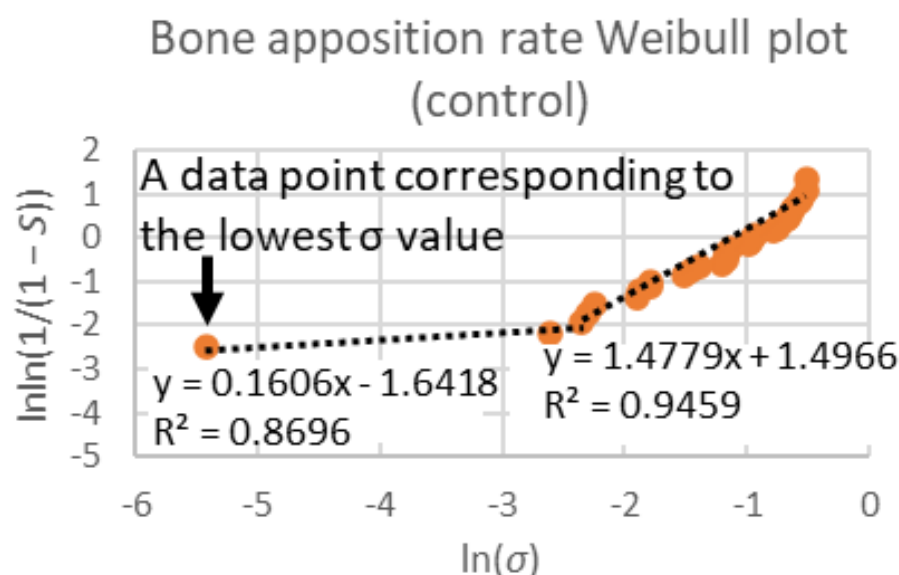

**Figure S1.** Bone apposition rate Weibull plot for control fitted with a bent line. A inflection point is set at  $\ln\sigma = -2.34$ .

However, it is unable to rule out that the bent line is an artifact. For bone apposition rate Weibull plot in the control group, we have 34 data of  $\sigma$ , among which two  $\sigma$  data are zero meaning that three physicians agreed that they are zero. These two data of  $\sigma = 0$  were excluded from Weibull plot, as  $\ln\sigma$  is invalid. However, in one of 34  $\sigma$  data, two physicians judged as  $\sigma = 0$  whereas one physician judged as  $\sigma = \text{non-zero}$  (0.013158), which gives an extremely low  $\sigma$  value ( $\sigma = 0.004385$ ;  $\ln\sigma = -5.4$ ) after averaging over the three physicians. The averaged value gives a data point corresponding to the lowest  $\sigma$  value in the bone apposition rate Weibull plot (Figure S1).

The data point corresponding to the lowest  $\sigma$  value critically determines the slope  $m$  of the regression line. If the judgement of  $\sigma = 0$  made by the two physicians is true and that made by the third physician is false, the true  $\sigma$  value is zero instead of 0.004385. Then the data point is excluded from the Weibull plot since  $\ln\sigma$  is invalid, giving a straight line with a slope of  $m > 1$  as shown in Figure S2 left. If the judgement of  $\sigma = 0$  made by the two physicians is false and that made by the third physician is true, one can regard  $\sigma$  as

0.013158 (without averaging) instead of 0.004385. In this case, the data points almost fall in a straight line again with a slope of  $m > 1$  (Figure S2 right).

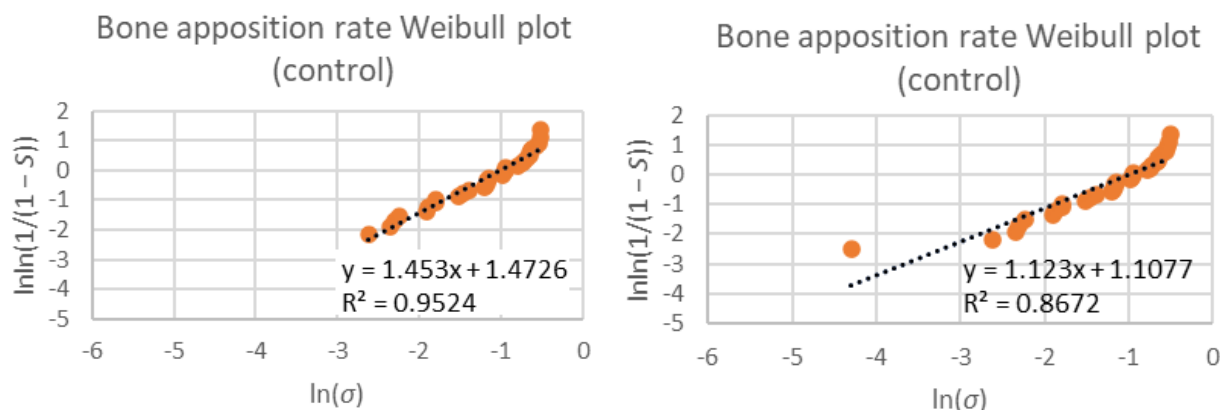

**Figure S2.** left : Bone apposition rate Weibull plot for control based on the assumption that the judgement of  $\sigma = 0$  made by the two physician is true and that made by the third physician is false on the data point corresponding to the lowest  $\sigma$  value. Right: Bone apposition rate Weibull plot for control based on the assumption that the judgement of  $\sigma = 0$  made by the two physician is false and that made by the third physician is true on the data point corresponding to the lowest  $\sigma$  value.

Therefore, on the one hand, bone apposition rate Weibull plots for control could show qualitatively different modes of causing impaired bone apposition in between the lower  $\sigma$  and the higher  $\sigma$  regions which have the slopes of  $m < 1$  and  $m > 1$ , respectively. On the other hand, the slope of  $m < 1$  in the lower  $\sigma$  region in bone apposition rate Weibull plots for control could be an artifact resulting from disagreement of judgement on whether  $\sigma$  is zero or non-zero.

The situation is similar to that of the bone apposition rate Weibull plot for the FGF-CP group (Figure S3). The Weibull plot could be regressed by a bent line with slopes of  $m > 1$  and  $m < 1$  as shown in Figure S3 upper, which is indicative of involvement of different mechanisms of causing impaired bone apposition in between the lower  $\sigma$  ( $\ln\sigma < -1.67$ ) and the higher  $\sigma$  ( $\ln\sigma > -1.67$ ) regions. However, on the data point corresponding to lowest  $\sigma$  value ( $\sigma = 0.008393$ ;  $\ln\sigma = -4.8$ ), two physicians judged as  $\sigma = 0$  whereas one physician judged as  $\sigma = \text{non-zero}$  (0.025879). If the judgement of  $\sigma = 0$  made by the two physicians is true and that made by the third physician is false, the true  $\sigma$  value is zero instead of 0.008393. Then the Weibull plot gives a straight line with a slope of  $m > 1$  (Figure S3 lower left). If the judgement of  $\sigma = 0$  made by the two physicians is false and that made by the third physician is true, one can regard  $\sigma$  as 0.025879 (without averaging) instead of 0.008393. In this case, the data points almost fall in a straight line again with a slope of  $m > 1$  (Figure S3 lower right).

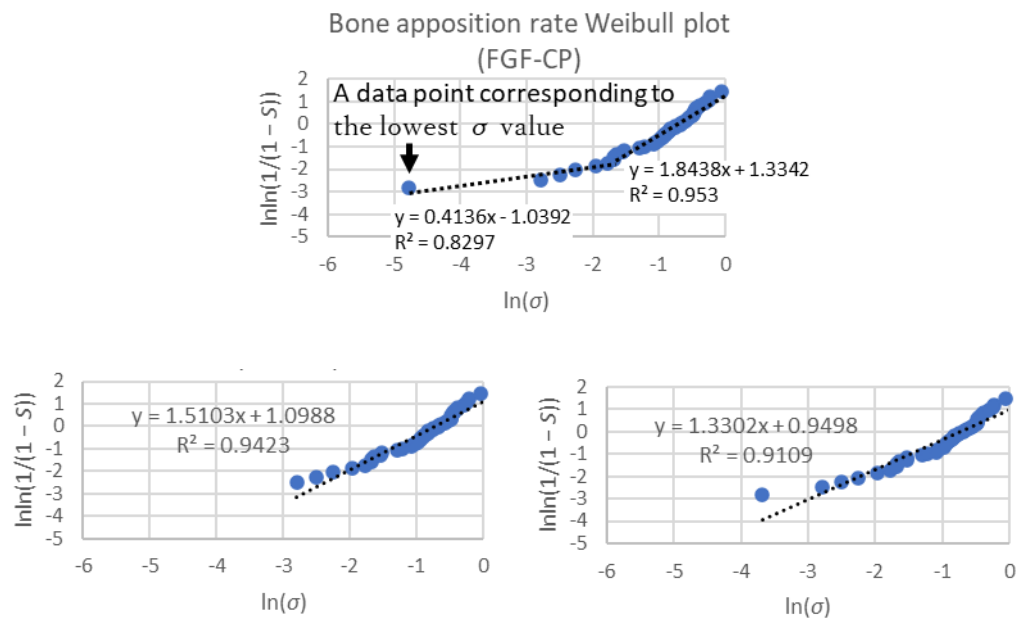

**Figure S3.** Bone apposition rate Weibull plots for FGF-CP. Upper: a plot fitted with a bent line with an inflection point set at  $\ln \sigma = -1.67$ . Lower left: a plot based on the assumption that the judgement of  $\sigma = 0$  made by the two physician is true and that made by the third physician is false on the data point corresponding to the lowest  $\sigma$  value. Lower right: a plot based on the assumption that the judgement of  $\sigma = 0$  made by the two physician is false and that made by the third physician is true on the data point corresponding to the lowest  $\sigma$  value.
